# Supplementary material for: Amphiphilic acetylacetone-based carbon dots
Source: Royal Society of Chemistry journal article supplement (doi:10.1039/d3tc04675c), 2024-01-01
Supplement: d3tc04675c1.pdf [file d3tc04675c1.pdf]

## Supporting Information

### Amphiphilic Acetylacetone-Based Carbon Dots

Sergei A. Cherevkov,<sup>a†</sup> Evgeniia A. Stepanidenko,<sup>a†</sup> Mikhail D. Miruschenko,<sup>a</sup> Andrei M. Zverkov,<sup>a</sup> Alexander M. Mitroshin,<sup>a,b</sup> Igor V. Margaryan,<sup>a</sup> Igor G. Spiridonov,<sup>a</sup> Denis V. Danilov,<sup>c</sup> Aleksandra V. Koroleva,<sup>c</sup> Evgeniy V. Zhizhin,<sup>c</sup> Marina V. Baidakova,<sup>d</sup> Roman V. Sokolov,<sup>d</sup> Maria A. Sandzhieva,<sup>e</sup> Elena V. Ushakova,<sup>a,f\*</sup> Andrey L. Rogach<sup>f,g</sup>

- a. International Research and Education Centre for Physics of Nanostructures, ITMO University, 197101 Saint Petersburg, Russia*
- b. Institute of Macromolecular Compounds Russian Academy of Sciences, Saint Petersburg 199004, Russia*
- c. Research Park, Saint Petersburg State University, 199034 Saint Petersburg, Russia*
- d. Ioffe Institute, 194021 Saint Petersburg, Russia*
- e. School of Physics and Engineering, ITMO University, 197101 Saint Petersburg, Russia*
- f. Department of Materials Science and Engineering, and Centre for Functional Photonics (CFP), City University of Hong Kong, Hong Kong SAR 999077, P. R. China*
- g. IT4Innovations, VSB – Technical University of Ostrava, 17. listopadu 2172/15, 70800 Ostrava-Poruba, Czech Republic*

\*Corresponding author: [elena.ushakova@itmo.ru](mailto:elena.ushakova@itmo.ru)

<sup>†</sup> Equal contribution

## **Materials**

Benzoic acid (BA,  $\geq 99.5\%$ ), acetylacetone ( $\geq 99\%$ ), and ethylenediamine (EDA,  $\geq 99.5\%$ ), polystyrene (PS) were obtained from Sigma-Aldrich (Darmstadt, Germany). Toluene ( $>99.5\%$ ), chloroform ( $>99.8\%$ ), acetone ( $>99.8\%$ ), acetonitrile ( $>99.8\%$ ), chlorobenzene ( $>99.5\%$ ), isopropanol ( $>99.8\%$ ), and glycerin ( $>98.5\%$ ) were purchased from Ekos-1 (Moscow, Russia). PVK (polyvinylcarbazole), PEDOT:PSS (poly(3,4 ethylenedioxythiophene):poly(styrenesulfonate)), and PolyTPD were obtained from Ossila (Sheffield, England). TBPi (2,2',2''-(1,3,5-benzinetriyl)-tris(1 phenyl 1 H benzimidazole)) was obtained from Lumtec (New Taipei City, Taiwan). Glass substrates with an indium tin oxide (ITO) layer were obtained from Kaivo LTD (Zhuhai, Guangdong, China). All reagents were of analytical grade and used directly without further purification. Deionized water was produced through a Millipore water purification system (Milli-Q, Millipore) and used throughout the study.

## **Dialysis procedure**

To purify the obtained crude product from possible contaminants including small molecules, the stock solution was firstly passed through a syringe filter (200 nm) to discard large agglomerates. Next, 5 mL of the stock solution was filled into in a dialysis bag with a molecular weight cut-off of 7 kDa, and placed into 700 mL of dialysate. For the first purification step, a mixture of water with isopropanol was used as a dialysate for better extruding both hydrophobic and hydrophilic moieties. The dialysate was changed no less than 10 times. Thin-film chromatography was then carried out to check for the presence of any possible moieties still present in the purified solution. As can be seen from Figure S1, the purified solution doesn't contain any molecular moieties.

## **Characterization**

A Libra 200FE (Zeiss, Oberkochen, Germany) transmission electron microscope (TEM) and a Solver Pro-M (NT-MDT, Moscow, Russia) atomic-force microscope (AFM) were used to study size and shape of CDs. For AFM measurements, 10  $\mu\text{L}$  solutions of CDs redispersed in 2-methoxyethanol at a concentration of 18 mg/mL were spin-cast onto the mica substrates at 4000 rpm for 40 sec, and annealed at 130°C for 15 min. X-Ray photoelectron spectroscopy (XPS) measurements were performed on an Escalab 250Xi (Thermo Fisher Scientific, Waltham, MA, USA) photoelectron spectrometer with AlK $\alpha$  radiation (photon energy 1486.6 eV) in the constant pass energy mode at 100 eV for the survey XPS spectrum and at 50 eV for the core-level spectra of single elements, using an XPS spot size of 650  $\mu\text{m}$ . X-ray diffraction (XRD) measurements were carried out on an X-ray powder diffractometer D2 Phaser (Bruker AXS GmbH, Germany), Cu-K $\alpha$ , Ni filter monochromatization, LYNXEYE semiconductor linear detector (Bruker AXS) with an opening angle of 5°, 2 $\theta$ - $\theta$  scanning. All spectroscopic studies were performed under an ambient atmosphere. Raman spectra were measured on an inVia (Renishaw, Wotton-under-Edge, UK) microspectrometer equipped with a 20 $\times$  objective (NA = 0.4) and a 514 nm laser source. Fourier-transform infrared (FTIR) spectra were recorded on a Tensor II infrared spectrophotometer (Bruker, Billerica, MA, U.S.) in an attenuated total reflection mode. Absorption spectra were measured using a Shimadzu UV3600 spectrophotometer (Shimadzu, Kyoto, Japan). Photoluminescence (PL) spectra and PL excitation-emission (PLE-PL) maps were recorded on a Cary Eclipse instrument (Agilent, Santa Clara, CA, USA). Time-resolved PL measurements were performed on a confocal microscope MicroTime 100 (PicoQuant, Berlin, Germany) equipped with a 3 $\times$  objective (NA = 0.1) and a 405 nm pulsed diode laser. For all optical measurements, CDs were dissolved in different solvents with concentration of 0.5 mg/mL. Electroluminescence spectra of CD-LEDs were obtained using a CAS 120 spectrometer (Instrument Systems, Munich, Germany). I/V characteristics were measured using a Keithley 2401 measuring source (Keithley Instruments, Solon, Ohio, USA). PL spectra from CD-LED were taken by an LSM-710 (Zeiss, Oberkochen, Germany) laser confocal microscope with a 405 nm diode laser.

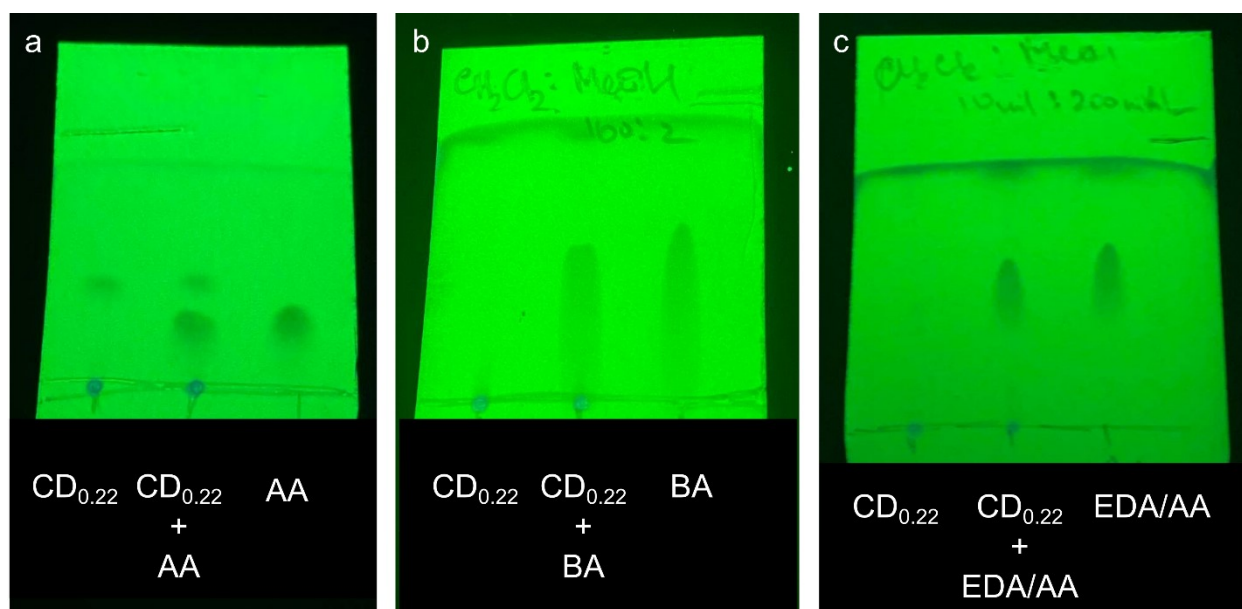

Figure S1. Photographs of thin-layer chromatography plates Sorbifill (Russia) for  $CD_{0.22}$  and the precursors, taken under UV light (254 nm). (a) Comparison with acetylacetone (AA): eluent - mixture of chloroform and hexane (10:3); Retention factor (Rf) for CDs - 0.5, for AA - 0.3. (b) Comparison with benzoic acid (BA): eluent - mixture of dichloromethane and methanol (100:2); Rf for CDs - 0, for AA - 0.6. (c) Comparison with ethylenediamine in acetylacetone (EDA/AA): eluent - mixture of dichloromethane and methanol (100:2); Rf for CDs - 0, for AA - 0.7. The difference in the spots on the plates clearly shows that the purified CDs do not contain any molecular moieties or residual precursors.

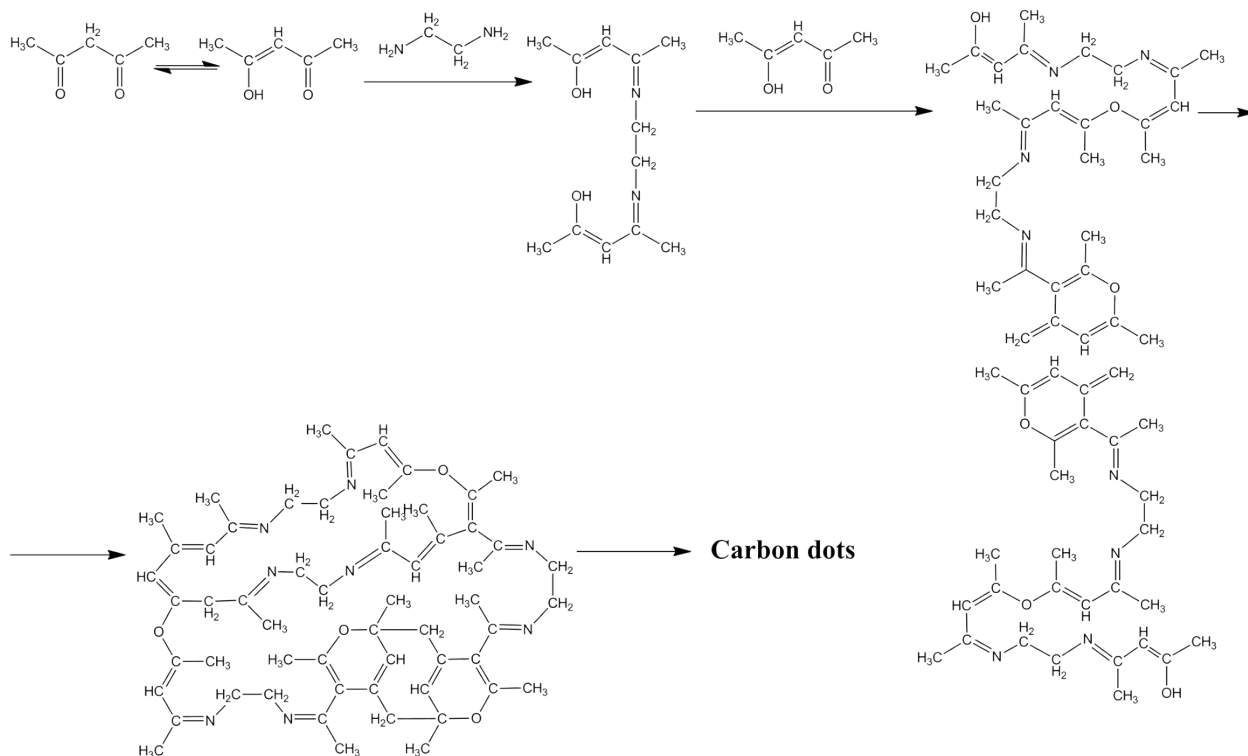

Figure S2. Possible reaction scheme for the formation of CD<sub>EDA</sub> from EDA in acetylacetone.

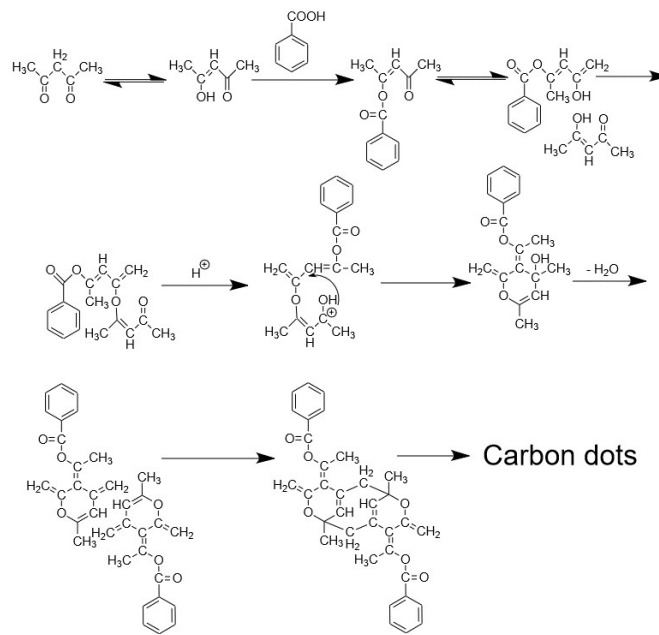

Figure S3. Possible reaction scheme for the formation of CD<sub>BA</sub> from BA in acetylacetone

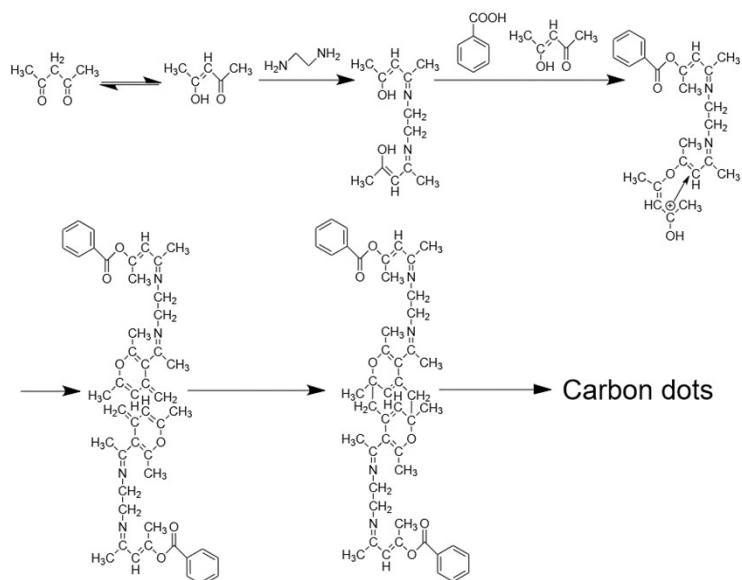

Figure S4. Possible reaction scheme for the formation of CD from BA and EDA in acetylacetone.

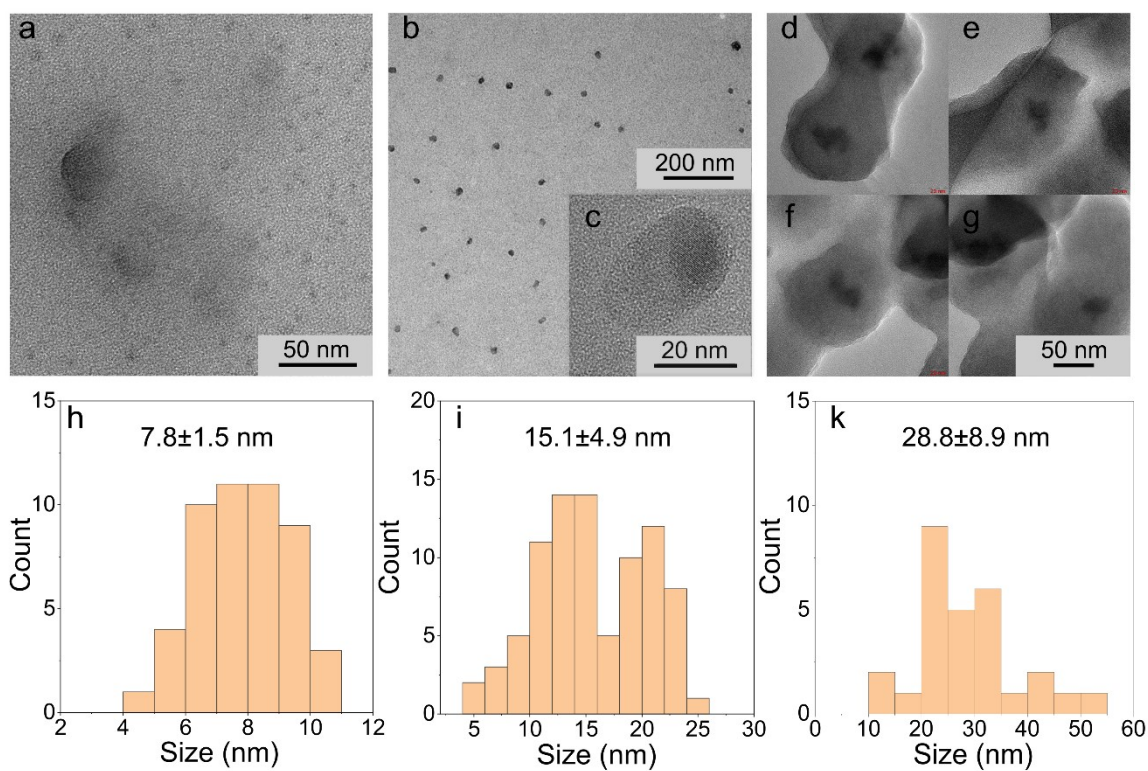

Figure S5. (a-g) TEM images of  $\text{CD}_{\text{EDA}}$  (a),  $\text{CD}_{0.22}$  (b, c), and  $\text{CD}_{\text{BA}}$  (d-g). Size distributions obtained from those TEM images for  $\text{CD}_{\text{EDA}}$  (h),  $\text{CD}_{0.22}$  (i), and  $\text{CD}_{\text{BA}}$  (k).

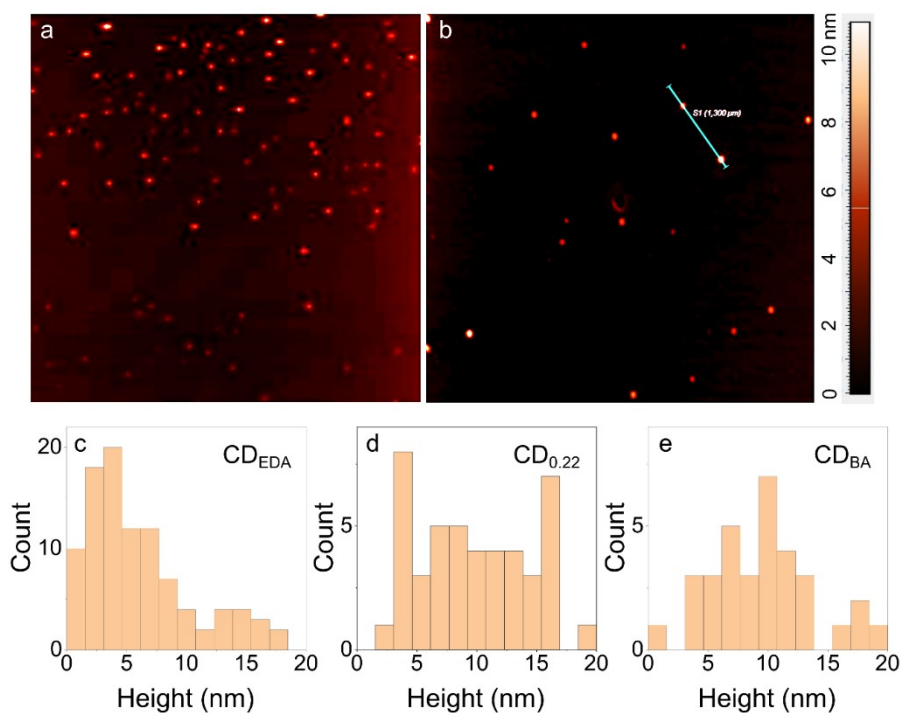

Figure S6. AFM images of  $CD_{EDA}$  (a) and  $CD_{BA}$  (b). Height distributions for  $CD_{EDA}$  (c),  $CD_{0.22}$  (d), and  $CD_{BA}$  (e) determined by AFM.

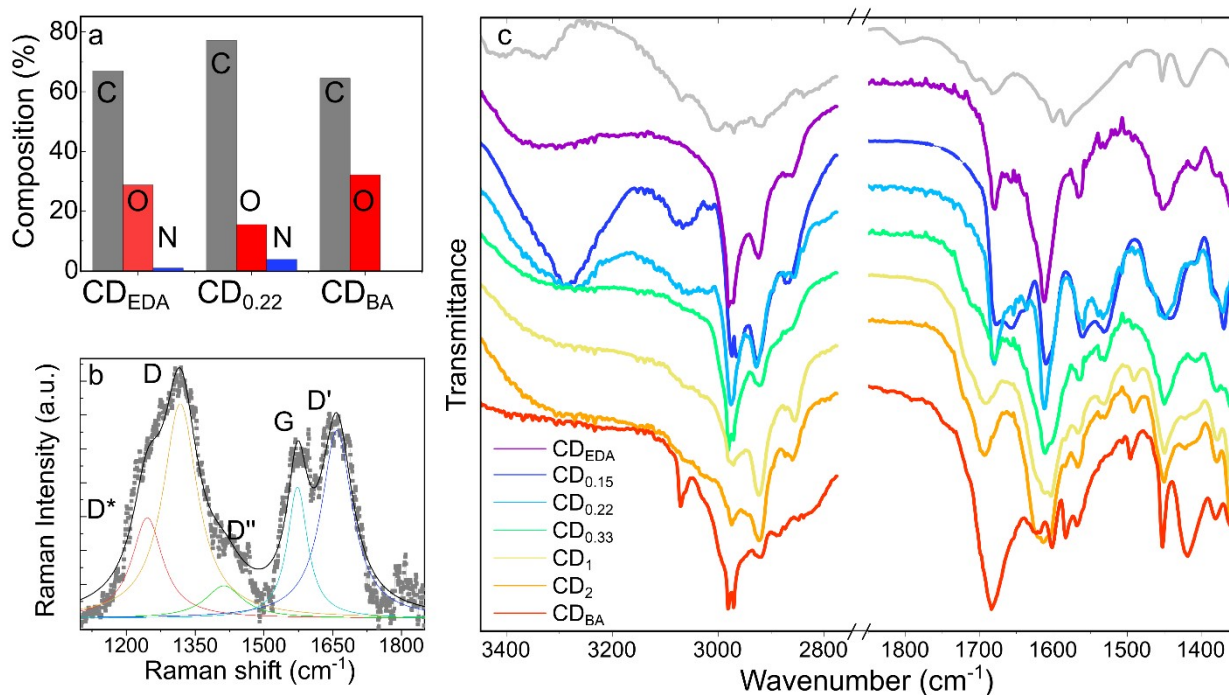

Figure S7. Chemical composition of amphiphilic CDs. (a) Atomic percentage of carbon (grey), oxygen (red), and nitrogen (blue) elements in  $CD_{EDA}$ ,  $CD_{0.22}$ , and  $CD_{BA}$  determined from XPS measurements. (b) Raman spectrum of  $CD_{0.22}$  and its deconvolution into  $D^*$  (red),  $D$  (orange),  $D''$  (green),  $G$  (cyan), and  $D'$  (blue) bands typical for carbon polymorphs. (c) FTIR spectra of amphiphilic CDs; grey-color spectrum on the top represents a sum of the precursor spectra (EDA, BA, and acetylacetone).

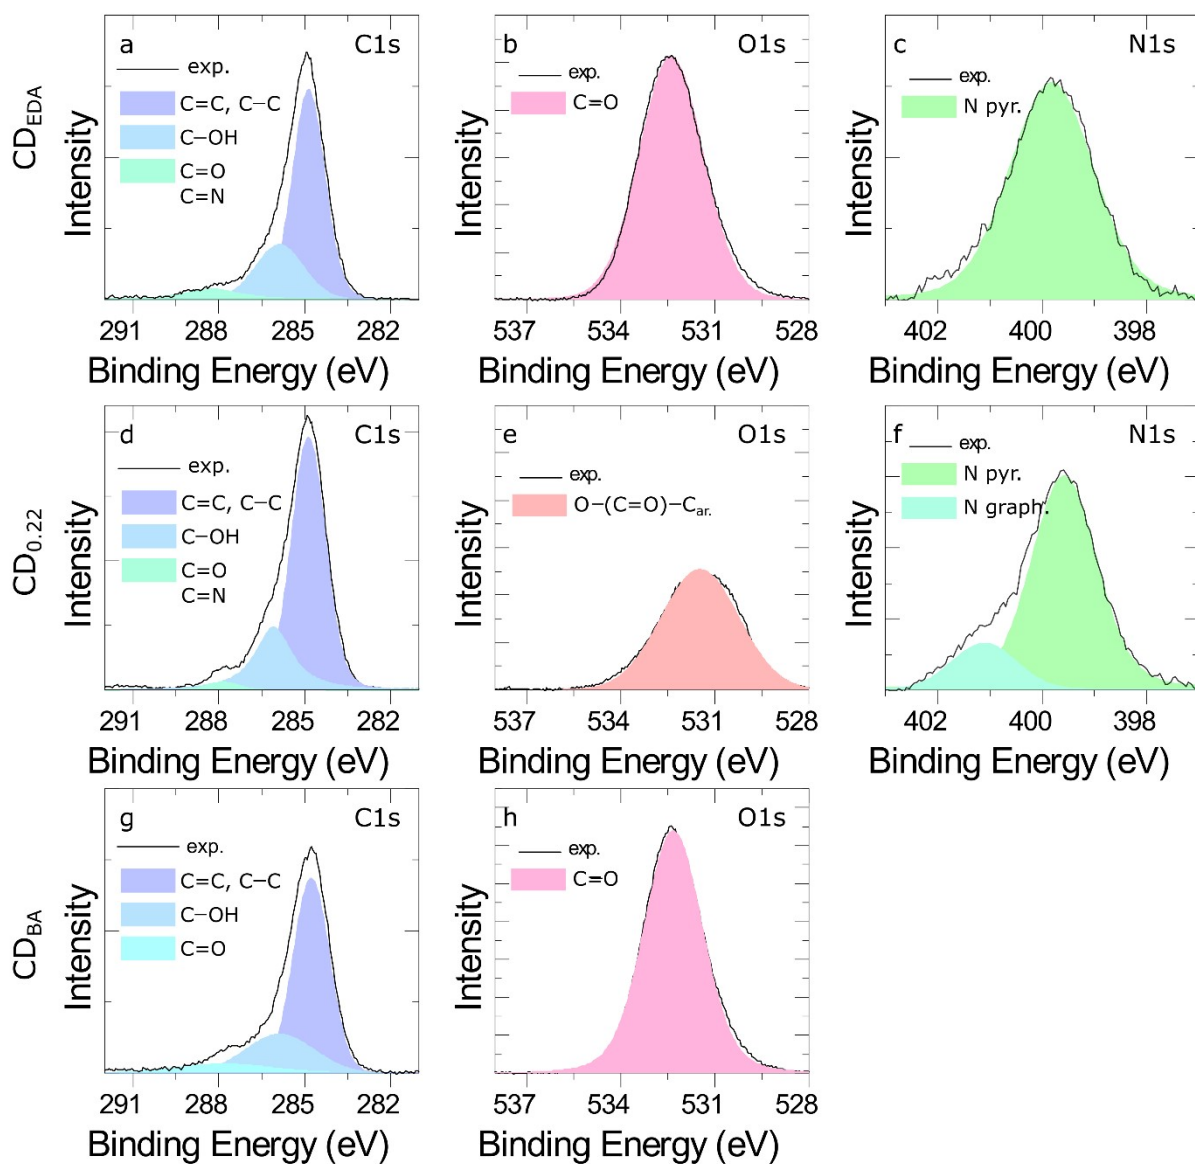

Figure S8. High resolution XPS spectra of C 1s (a, d, g), O 1s (b, e, h), and N 1s (c, f) for  $CD_{EDA}$  (a-c),  $CD_{0.22}$  (d-f), and  $CD_{BA}$  (g, h). Considering the width of N 1s band, the peak can be attributed to pyridinic (398 eV) and graphitic (401 eV) N.



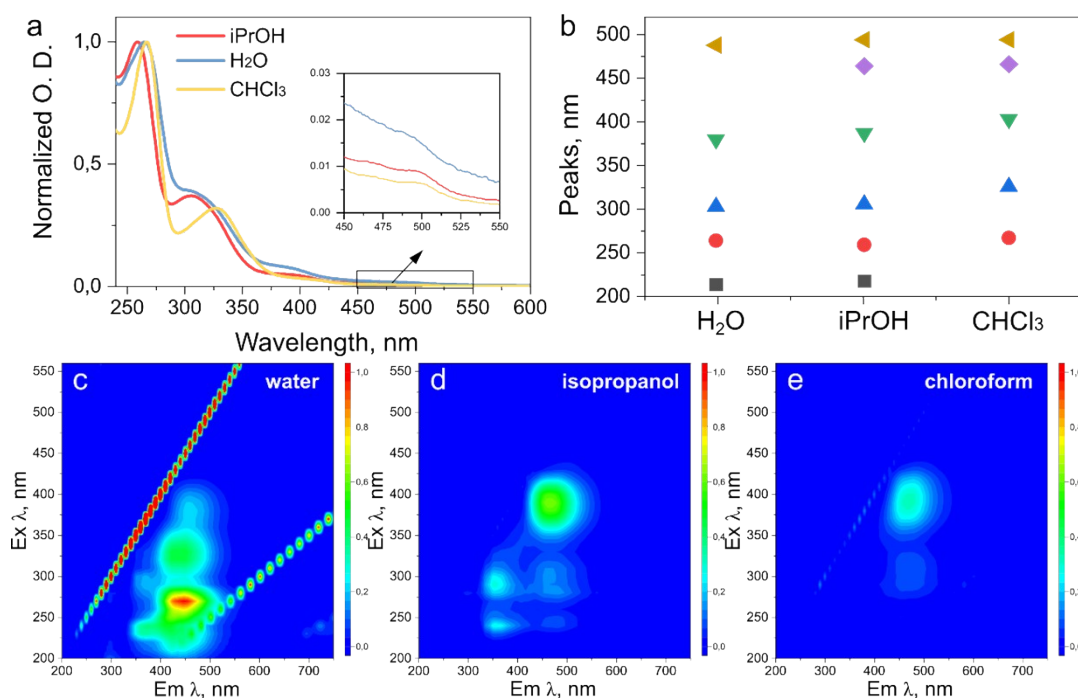

Figure S9. Optical properties of CD<sub>EDA</sub>. (a) Absorption spectra, the inset shows zoom-in of the 450-550 nm spectral region; (b) peaks position, corresponding to the absorption bands Abs-1 (green triangles), Abs-2 (blue triangles), Abs-3 (red circles) from Table S1, and to absorption peaks not contributing to emission: UV absorption band (black squares) and the bands at 450-500 nm (purple diamonds and yellow triangles). (c-e) PLE-PL maps in water (c), isopropanol (d), and chloroform (e).

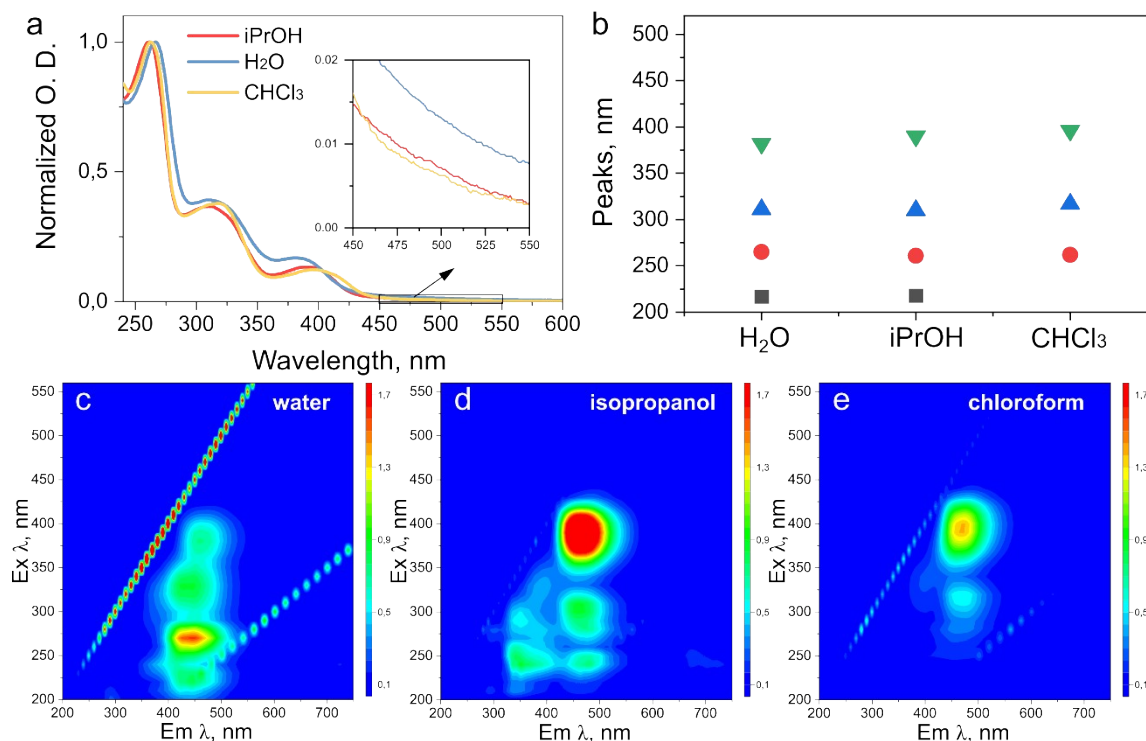

Figure S10. Optical properties of CD<sub>0.15</sub>. (a) Absorption spectra, the inset shows zoom-in of the 450-550 nm spectral region; (b) peaks position, corresponding to the absorption bands Abs-1 (green triangles), Abs-2 (blue triangles), Abs-3 (red circles) from Table S1, and to absorption peaks not contributing to emission: UV absorption band (black squares). (c-e) PLE-PL maps in water (c), isopropanol (d), and chloroform (e).



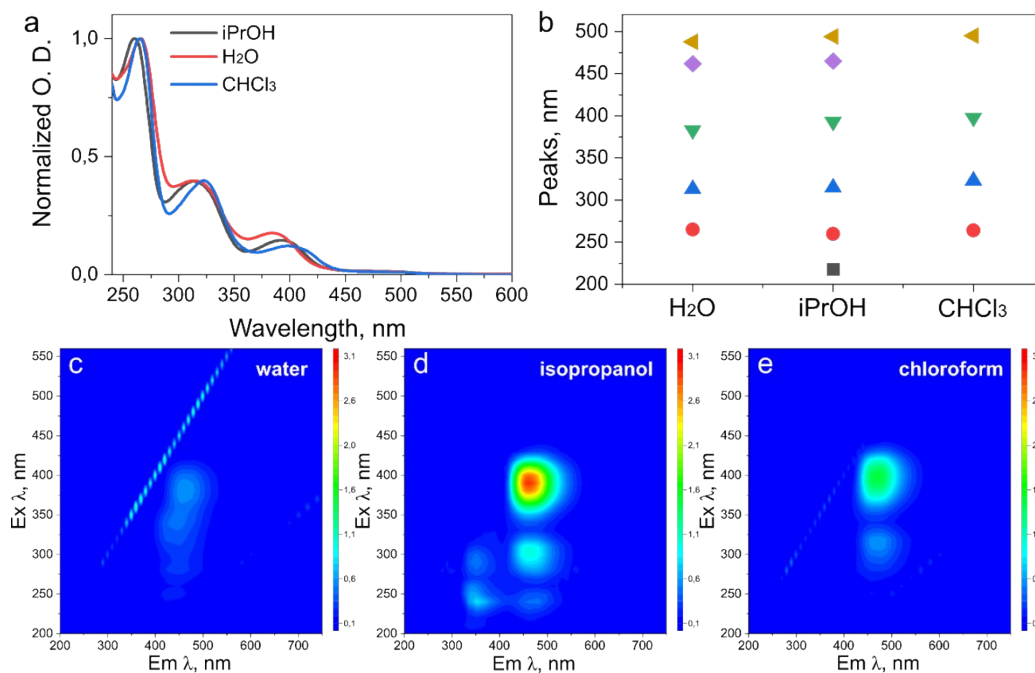

Figure S11. Optical properties of CD<sub>0.22</sub>. (a) Absorption spectra, the inset shows zoom-in of the 450-550 nm spectral region; (b) peaks position, corresponding to the absorption bands Abs-1 (green triangles), Abs-2 (blue triangles), Abs-3 (red circles) from Table S1, and to absorption peaks not contributing to emission: UV absorption band (black squares) and the bands at 450-500 nm (purple diamonds and yellow triangles). (c-e) PLE-PL maps in water (c), isopropanol (d), and chloroform (e).

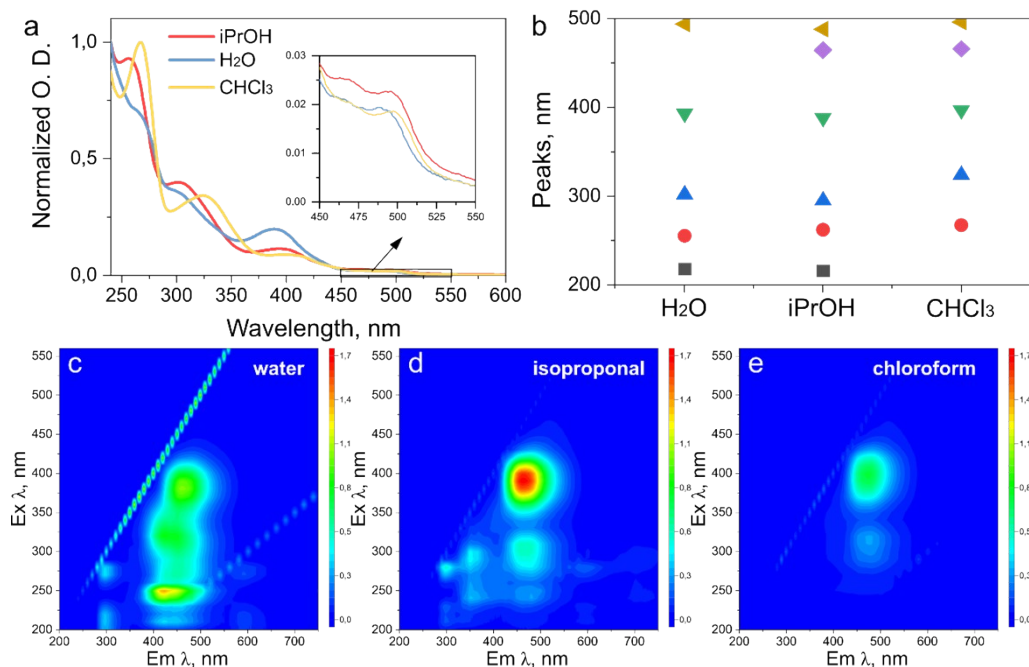

Figure S12. Optical properties of CD<sub>0.33</sub>. (a) Absorption spectra, the inset shows zoom-in of the 450-550 nm spectral region; (b) peaks position, corresponding to the absorption bands Abs-1 (green triangles), Abs-2 (blue triangles), Abs-3 (red circles) from Table S1, and to absorption peaks not contributing to emission: UV absorption band (black squares) and the bands at 450-500 nm (purple diamonds and yellow triangles). (c-e) PLE-PL maps in water (c), isopropanol (d), and chloroform (e).

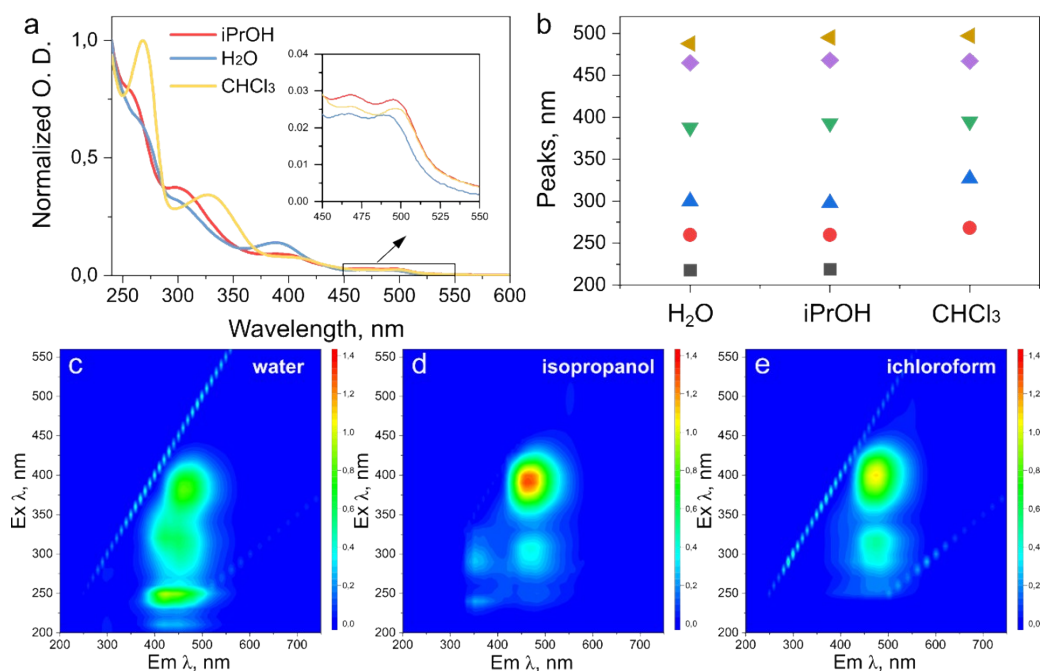

Figure S13. Optical properties of CD<sub>1</sub>. (a) Absorption spectra, the inset shows zoom-in of the 450-550 nm spectral region; (b) peaks position, corresponding to the absorption bands Abs-1 (green triangles), Abs-2 (blue triangles), Abs-3 (red circles) from Table S1, and to absorption peaks not contributing to emission: UV absorption band (black squares) and the bands at 450-500 nm (purple diamonds and yellow triangles). (c-e) PLE-PL maps in water (c), isopropanol (d), and chloroform (e).

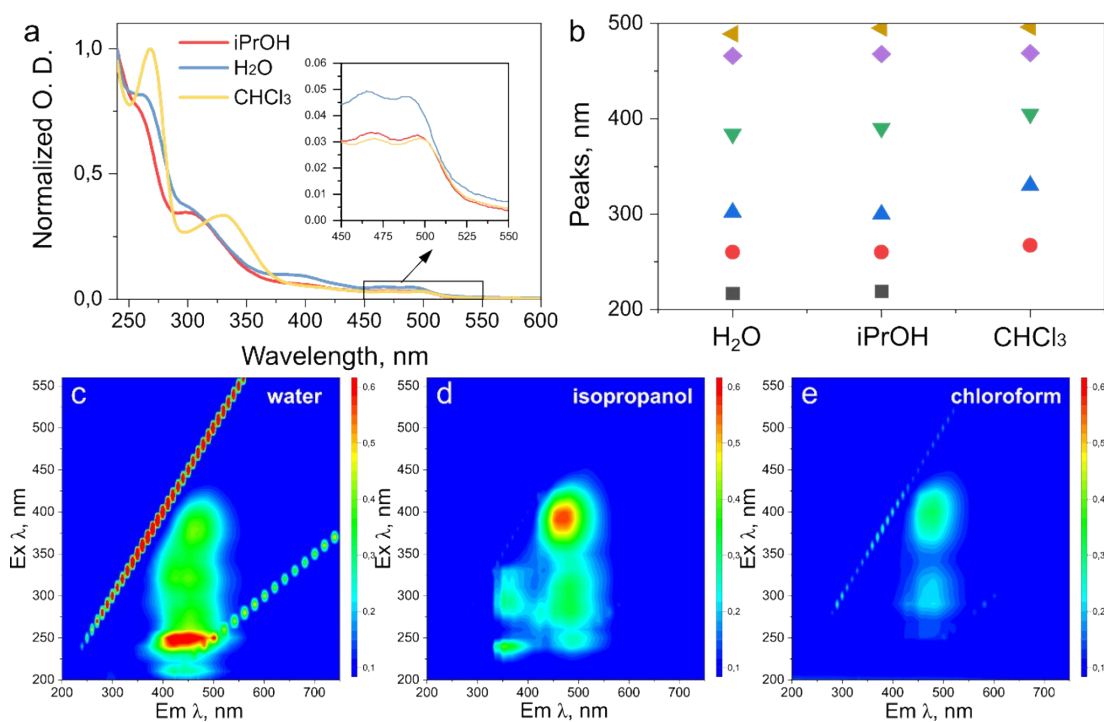

Figure S14. Optical properties of CD<sub>2</sub>. (a) Absorption spectra, the inset shows zoom-in of the 450-550 nm spectral region; (b) peaks position, corresponding to the absorption bands Abs-1 (green triangles), Abs-2 (blue triangles), Abs-3 (red circles) from Table S1, and to absorption peaks not contributing to emission: UV absorption band (black squares) and the bands at 450-500 nm (purple diamonds and yellow triangles). (c-e) PLE-PL maps in water (c), isopropanol (d), and chloroform (e).

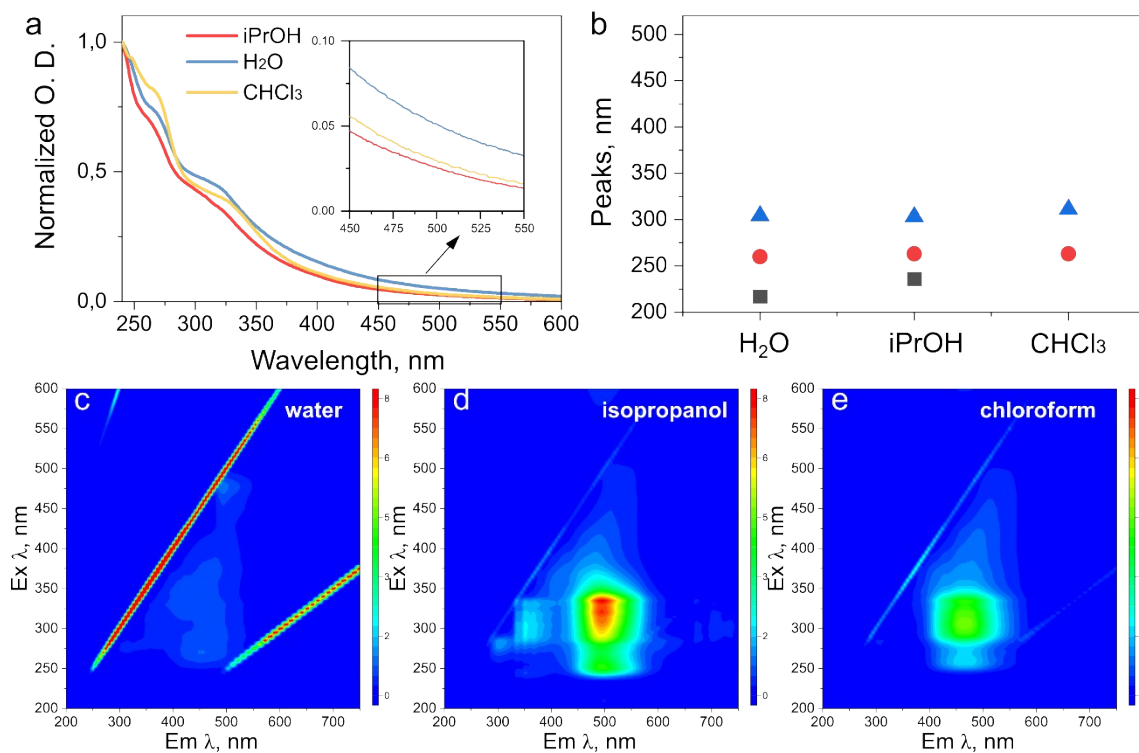

Figure S15. Optical properties of CD<sub>BA</sub>. (a) Absorption spectra, the inset shows zoom-in of the 450-550 nm spectral region; (b) peaks position, corresponding to the absorption bands Abs-2 (blue triangles) and Abs-3 (red circles) from Table S1, and to absorption peaks not contributing to emission: UV absorption band (black squares). (c-e) PLE-PL maps in water (c), isopropanol (d), and chloroform (e).

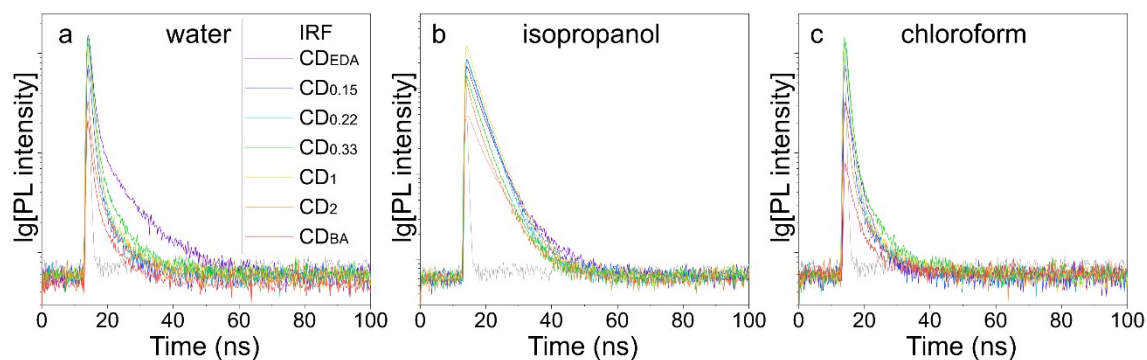

Figure S16. PL decays of the CD samples listed on the frame (a) in water (a), isopropanol (b), and chloroform (c).

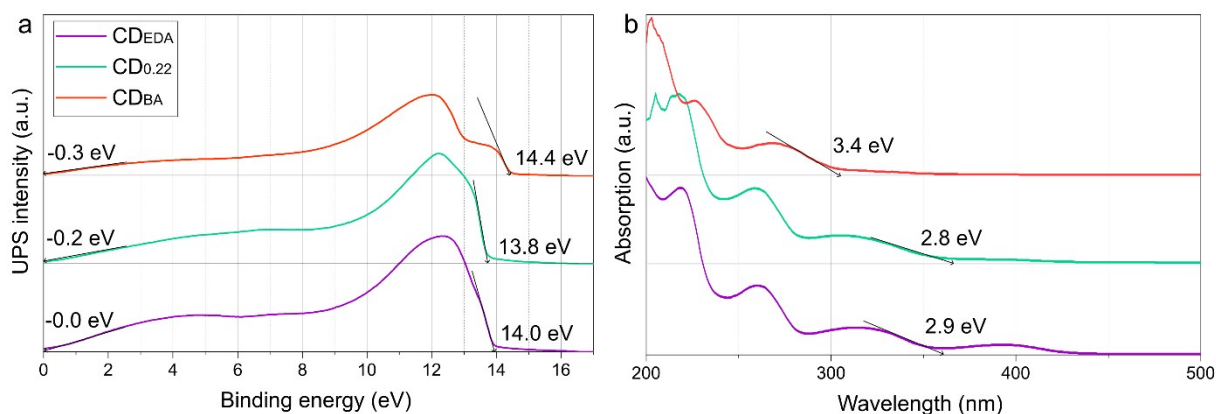

Figure S17. (a) UPS spectra of CD<sub>EDA</sub>, CD<sub>0.22</sub>, and CD<sub>BA</sub>. Arrows show the tangent of the curves used to determine the spectral width. (b) Absorption spectra of CD<sub>EDA</sub>, CD<sub>0.22</sub>, and CD<sub>BA</sub>. Arrows show the tangent of the curves used to determine the energy bandgap.

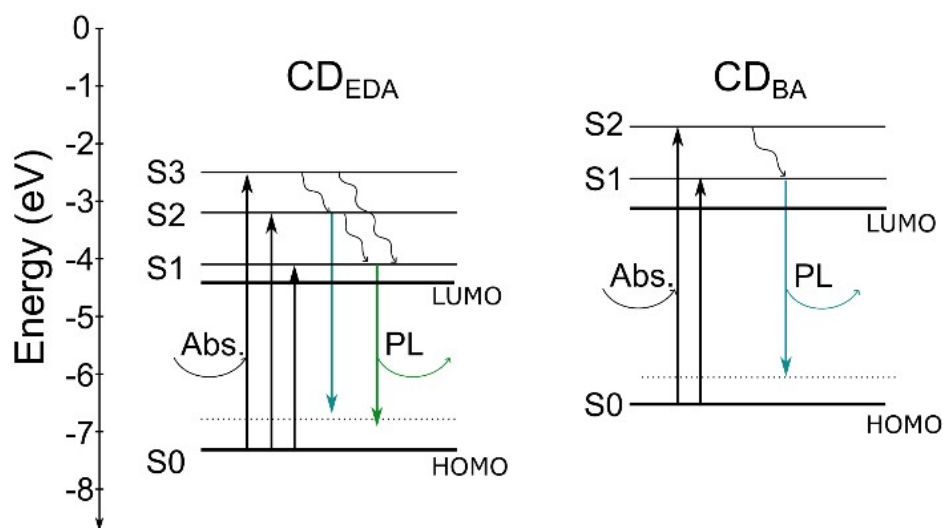

Figure S18. Suggested energy level structures of CD<sub>EDA</sub> and CD<sub>BA</sub>. From the optical data, one can identify excited states shown as thin black lines towards S1, S2, and S3 states for CD<sub>EDA</sub>, and S1 and S2 states for CD<sub>BA</sub>, which correspond to the absorption peaks listed in Table S3. Nonradiative transitions are shown by wavy lines. For CD<sub>EDA</sub>, the radiative transitions of the two emissive centers corresponding to PL-1 and PL-2 in Table S3 are shown by colored arrows from the S2 and S3 energy levels, respectively. For CD<sub>BA</sub>, only one radiative transition is observed from the S2 excited level.

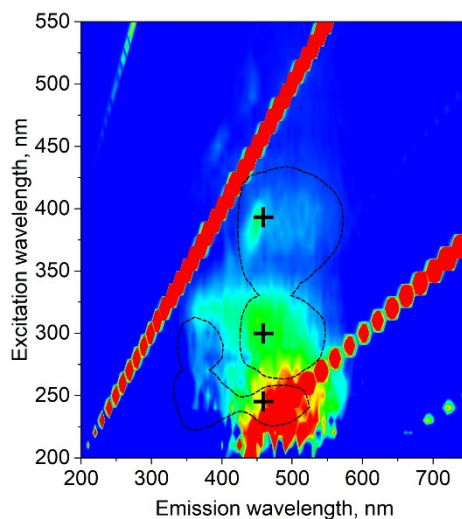

Figure S19. PLE-PL map of the CD<sub>0.22</sub>@PVK film. An area shown by dashed curve represents several emissive centers observed for CD<sub>0.22</sub> in isopropanol, with the maxima shown by the crosses.

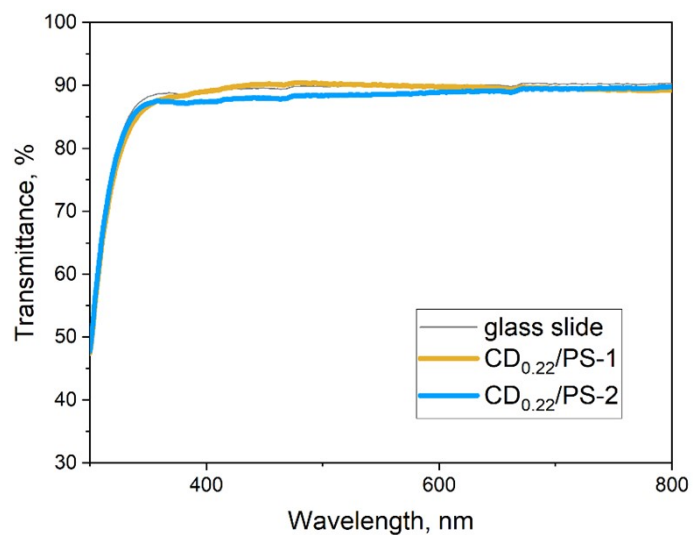

Figure S20. Transmission spectra of CD<sub>0.22</sub>/PS-1 (orange line), CD<sub>0.22</sub>/PS-2 (blue line), and glass slide (grey line).

Table S1. Comparison of synthetic and optical parameters of amphiphilic CDs, based on literature data and for those fabricated in this work.

| CD precursors                                                                                  | Synthes is method *     | Solvents in which CDs are soluble | Abs pea k, nm | PL pea k, nm | Max. PLQY, %     | Referen ce |
|------------------------------------------------------------------------------------------------|-------------------------|-----------------------------------|---------------|--------------|------------------|------------|
| Paraplast, dodecanthiol in toluene                                                             | HI, 70 °C, 3h           | Toluene                           | 285           | 450          | N/A              | [1]        |
| Rhodamine B, ethanol, Polyethylene glycol                                                      | ST, 200 °C, 20 h        | petroleum ether – water           | 395           | 495          | 22.85            | [2]        |
| Dodecylamine in chlorobenzene                                                                  | HI, 6-48 h              | toluene – DMSO                    | N/A           | 486          | 10.83            | [3]        |
| 1-[Bis(dimethylamino)methylene]-1H-1,2,3-triazolo[4,5-b]pyridinium 3-oxide hexafluorophosphate | ST, 150 °C, 8 h         | toluene – water                   | 350           | 530          | 20               | [4]        |
| citric acid and dodecylamine in c-hexane                                                       | ST, 160 °C, 18 h        | c-hexane – methanol               | 432           | 535          | 33.1 (c-hexane)  | [5]        |
| Banana peel extract and phosphoric acid                                                        | Pyrolysis, 85 °C, 0.5 h | c-hexane – water                  | 422           | 510 - 560    | 32 (butanol)     | [6]        |
| Citric acid, 4,7,10-Trioxa-1,13-tridecanediamine                                               | MW, 700 W, 5 min        | chloroform – water                | 300           | 440          | 29               | [7]        |
| Polyamine in ethanol                                                                           | ST, 180 °C, 5 h         | water, buffer solutions           | 345 - 365     | 445 - 460    | N/A              | [8]        |
| 2-aminophenol in ethanol                                                                       | ST, 180 °C, 12 h        | hexane – ethanol                  | 430           | 531          | N/A              | [9]        |
| Citric acid, organosilane                                                                      | HT, 180 °C, 12 h        | Water/organosilane                | 360           | 450          | 82               | [10]       |
| Citric acid, organosilane                                                                      | HI, 240 °C, 1-60 min    | organosilane                      | N/A           | 435 - 445    | 28-50            | [11]       |
| Polybasic acid, organosilane                                                                   | HI, 240 °C, 1-60 min    | organosilane                      | 349           | 441          | 88**             | [12]       |
| Ethylenediamine and benzoic acid in acetylacetone                                              | ST, 190 °C, 8 h         | tetrachloromethane - water        | 390           | 460          | 36 (isopropanol) | This work  |

\* HI – hot injection, ST – solvothermal, MW – microwave-assisted.

\*\* optical parameters are given for best sample of CDs in Gel glasses.



Table S2. Amount of precursors used in the synthesis of CDs produced in this work.

| Sample name        | Precursors |         | Precursors, mmol |      | Molar ratio BA/EDA |
|--------------------|------------|---------|------------------|------|--------------------|
|                    | BA, g      | EDA, mL | BA               | EDA  |                    |
| CD <sub>EDA</sub>  | 0          | 0.5     | 0                | 7.5  | -                  |
| CD <sub>0.15</sub> | 0.3        | 1.14    | 2.5              | 17.0 | 0.15               |
| CD <sub>0.22</sub> | 0.3        | 0.76    | 2.5              | 11.4 | 0.22               |
| CD <sub>0.33</sub> | 0.3        | 0.5     | 2.5              | 7.5  | 0.33               |
| CD <sub>1</sub>    | 0.3        | 0.17    | 2.5              | 2.5  | 1                  |
| CD <sub>2</sub>    | 0.3        | 0.085   | 2.5              | 1.25 | 2                  |
| CD <sub>BA</sub>   | 0.3        | 0       | 2.5              | 0    | -                  |

Table S3. Optical properties of CDs in isopropanol: absorption peaks position (Abs-1, Abs-2, Abs-3), PL excitation peaks position (PLE-1, PLE-2, PLE-3), and PL peaks position (PL-1, PL-2)

| Sample name        | Abs-3, Nm | Abs-2, nm | Abs-1, nm | PLE-3 (PL-2/PL-1), nm | PLE-2 (PL-2/PL-1), Nm | PLE-1 (PL-1), nm | PL-2, Nm | PL-1, nm |
|--------------------|-----------|-----------|-----------|-----------------------|-----------------------|------------------|----------|----------|
| CD <sub>EDA</sub>  | 260       | 305       | 390       | 240/240               | 290/290               | 390              | 355      | 465      |
| CD <sub>0.15</sub> | 261       | 310       | 390       | 245/240               | 290/305               | 390              | 350      | 460      |
| CD <sub>0.22</sub> | 260       | 315       | 395       | 240/240               | 290/300               | 390              | 350      | 460      |
| CD <sub>0.33</sub> | 260       | 300       | 395       | 240/245               | 290/30                | 390              | 355      | 465      |
| CD <sub>1</sub>    | 260       | 300       | 395       | 240/248               | 290/305               | 390              | 350      | 465      |
| CD <sub>2</sub>    | 260       | 300       | 390       | 240/248               | 290/290               | 390              | 355      | 470      |
| CD <sub>BA</sub>   | 260       | 315       | -         | -                     | -                     | 320              | -        | 495      |

Table S4. PL lifetime ( $\tau$ ), PL QYs, radiative ( $\Gamma$ ) and nonradiative ( $k_{nr}$ ) recombination rates for the CDs fabricated in this work.

| Sample name        | Water       |         |                                       |                                       | Isopropanol |         |                                       |                                       | Chloroform  |         |                                       |                                       |
|--------------------|-------------|---------|---------------------------------------|---------------------------------------|-------------|---------|---------------------------------------|---------------------------------------|-------------|---------|---------------------------------------|---------------------------------------|
|                    | $\tau$ , ns | PLQY, % | $\Gamma \cdot 10^9$ , s <sup>-1</sup> | $k_{nr} \cdot 10^9$ , s <sup>-1</sup> | $\tau$ , ns | PLQY, % | $\Gamma \cdot 10^9$ , s <sup>-1</sup> | $k_{nr} \cdot 10^9$ , s <sup>-1</sup> | $\tau$ , ns | PLQY, % | $\Gamma \cdot 10^9$ , s <sup>-1</sup> | $k_{nr} \cdot 10^9$ , s <sup>-1</sup> |
| CD <sub>EDA</sub>  | 7.5         | 5       | 0.01                                  | 0.13                                  | 5.0         | 25      | 0.05                                  | 0.15                                  | 3.5         | 16      | 0.05                                  | 0.24                                  |
| CD <sub>0.15</sub> | 4.0         | 6       | 0.02                                  | 0.24                                  | 4.3         | 34      | 0.08                                  | 0.15                                  | 2.8         | 21      | 0.08                                  | 0.28                                  |
| CD <sub>0.22</sub> | 4.2         | 7       | 0.02                                  | 0.22                                  | 4.0         | 36      | 0.09                                  | 0.16                                  | 2.8         | 22      | 0.08                                  | 0.28                                  |
| CD <sub>0.33</sub> | 4.5         | 6       | 0.01                                  | 0.21                                  | 4.3         | 25      | 0.06                                  | 0.18                                  | 4.7         | 16      | 0.03                                  | 0.18                                  |
| CD <sub>1</sub>    | 4.4         | 7       | 0.02                                  | 0.21                                  | 4.0         | 21      | 0.05                                  | 0.20                                  | 4.3         | 14      | 0.03                                  | 0.20                                  |
| CD <sub>2</sub>    | 5.2         | 5       | 0.01                                  | 0.18                                  | 4.6         | 12      | 0.03                                  | 0.19                                  | 4.0         | 8       | 0.02                                  | 0.23                                  |
| CD <sub>BA</sub>   | 5.6         | 2       | 0.005                                 | 0.18                                  | 4.4         | 7       | 0.02                                  | 0.22                                  | 6.3         | 2       | 0.005                                 | 0.15                                  |

Table S5. Energy level values for CD<sub>EDA</sub>, CD<sub>0.22</sub>, and CD<sub>BA</sub> calculated from UPS, absorption, PLE and PL spectra.

| Sample name        | HOMO, eV | LUMO, eV | Energy gap, eV | Abs, eV      | PLE, eV      | PL, eV   |
|--------------------|----------|----------|----------------|--------------|--------------|----------|
| CD <sub>EDA</sub>  | -7.3     | -4.4     | 2.9            | -2.5/3.2/4.1 | -2.1/3.0/4.1 | -5.6/5.7 |
| CD <sub>0.22</sub> | -7.2     | -4.4     | 2.8            | -2.4/3.3/4.0 | -2.0/3.1/4.0 | -5.5/5.8 |
| CD <sub>BA</sub>   | -6.5     | -3.1     | 3.4            | -1.7/2.6     | -2.6         | -5.1     |

Table S6. Comparison of parameters of CD-based LEDs, based on the literature data and for those fabricated in this work.

| CD precursors                                                                                                       | PL QY, % | LED configuration                              | Maximal luminance, cd/m <sup>2</sup> | Current efficiency, cd/A | Turn-on voltage, V | Threshold voltage, V | Color      | Ref. |
|---------------------------------------------------------------------------------------------------------------------|----------|------------------------------------------------|--------------------------------------|--------------------------|--------------------|----------------------|------------|------|
| citric acid and diaminonaphthalene/amination step with ammonia liquor and hydrazine                                 | 80       | ITO/PEDOT:PSS/TFB/PVK:CQDs/TPBI/LiF/Al         | 5240                                 | 2.6                      | 4.5-7.5            | N/A                  | Deep-blue  | [13] |
| citric acid and hexadecylamine in octadecene                                                                        | 41       | ITO/PVK:CDs/TPBI/LiF/Al                        | 569.8                                | N/A                      | 8.5                | N/A                  | Blue       | [14] |
| Phloroglucinol in ethanol                                                                                           | 72       | ITO/PEDOT:PSS/PVK:CQDs/TPBI/Ca/Al              | 4762                                 | 5.1                      | 3.1-4.3            | N/A                  | Green      | [15] |
| 1,3,5-benzenetricarboxylic acid, guanidinium dihydrogen phosphate, and 3,4,9,10-perylenetetracarboxylic dianhydride | 42.3     | ITO/PEDOT:PSS/CD-organic framework/TPBI/LiF/Al | 1818                                 | 4.0                      | 3.3                | N/A                  | Red        | [16] |
| N,N-dimethyl-, N,N-diethyl-, and N,N-dipropyl-p-PD in DMF                                                           | 86       | ITO/PEDOT:PSS/Poly-TPD/PVK:CQDs/TPBI/Ca/Al     | 5909                                 | 3.65-3.85                | 3.0-3.3            | N/A                  | Warm white | [17] |
| citric acid and hexadecylamine in octadecene                                                                        | 41       | ITO/PVK:CDs/TPBI or TmPyPB/LiF/Al              | 455.2                                | N/A                      | N/A                | 8.5-9.5              | White      | [18] |
| Fenugreek seed derived                                                                                              | 7.5      | ITO/PEDOT:PSS/PVK:CDs/Bp4mPy/LiF/Al            | 115.4                                | N/A                      | 5.8                | 2.5                  | Blue-      | [19] |

|                                                   |    |                                            |      |     |     |     |             |                  |  |
|---------------------------------------------------|----|--------------------------------------------|------|-----|-----|-----|-------------|------------------|--|
| CDs                                               |    |                                            |      |     |     |     |             | green            |  |
| Ethylenediamine and benzoic acid in acetylacetone | 36 | ITO/PEDOT:PSS/Poly-TPD/PVK:CDs/TPBI/LiF/Al | 1716 | 0.2 | 5.2 | 9.7 | Broad Green | <b>This work</b> |  |

## References

- [1] A. Talib, S. Pandey, M. Thakur, H.F. Wu, Synthesis of highly fluorescent hydrophobic carbon dots by hot injection method using Paraplast as precursor, *Materials Science and Engineering C* 48 (2015) 700–703. <https://doi.org/10.1016/j.msec.2014.11.058>.
- [2] X. Shi, X. Wang, S. Zhang, Z. Zhang, X. Meng, H. Liu, Y. Qian, Y. Lin, Y. Yu, W. Lin, H. Wang, Hydrophobic Carbon Dots Derived from Organic Pollutants and Applications in NIR Anticounterfeiting and Bioimaging, *Langmuir* 39 (2023) 5056–5064. [https://doi.org/10.1021/ACS.LANGMUIR.3C00075/ASSET/IMAGES/LARGE/LA3C00075\\_0007.JPEG](https://doi.org/10.1021/ACS.LANGMUIR.3C00075/ASSET/IMAGES/LARGE/LA3C00075_0007.JPEG).
- [3] K. Yin, D. Lu, L. Wang, Q. Zhang, J. Hao, G. Li, H. Li, Hydrophobic Carbon Dots from Aliphatic Compounds with One Terminal Functional Group, *Journal of Physical Chemistry C* 123 (2019) 22447–22456. <https://doi.org/10.1021/acs.jpcc.9b04479>.
- [4] P. Zhao, X. Li, G. Baryshnikov, B. Wu, H. Ågren, J. Zhang, L. Zhu, One-step solvothermal synthesis of high-emissive amphiphilic carbon dots via rigidity derivation, *Chem Sci* 9 (2018) 1323–1329. <https://doi.org/10.1039/C7SC04607C>.
- [5] Y. Liu, D. Sun, Z. Zhang, L. Zhang, S. Nie, J. Xiao, Y.S. Chung, H. Choi, S. Kim, C. Liu, Amphiphilic Carbon Dots with Excitation-Independent Double-Emissions, *Particle and Particle Systems Characterization* 37 (2020) 2000146. <https://doi.org/10.1002/ppsc.202000146>.
- [6] S. Prakash, S. Sahu, B. Patra, A.K. Mishra, Understanding the aggregation of excitation wavelength independent emission of amphiphilic carbon dots for bioimaging and organic acid sensing, *Spectrochim Acta A Mol Biomol Spectrosc* 290 (2023) 122257. <https://doi.org/10.1016/J.SAA.2022.122257>.
- [7] Y. Choi, S. Jo, A. Chae, Y.K. Kim, J.E. Park, D. Lim, S.Y. Park, I. In, Simple Microwave-Assisted Synthesis of Amphiphilic Carbon Quantum Dots from A3/B2 Polyamidation Monomer Set, *ACS Appl Mater Interfaces* 9 (2017) 27883–27893. [https://doi.org/10.1021/ACSAMI.7B06066/ASSET/IMAGES/LARGE/AM-2017-06066E\\_0008.JPEG](https://doi.org/10.1021/ACSAMI.7B06066/ASSET/IMAGES/LARGE/AM-2017-06066E_0008.JPEG).
- [8] P. Chen, X. He, Y. Hu, X.L. Tian, X.Q. Yu, J. Zhang, Spleen-Targeted mRNA Delivery by Amphiphilic Carbon Dots for Tumor Immunotherapy, *ACS Appl Mater Interfaces* 15 (2023) 19937–19950. <https://doi.org/10.1021/acsami.3c00494>.
- [9] A. Mikhraliieva, O. Tkachenko, R. Freire, V. Zaitsev, Y. Xing, A. Panteleimonov, M. Strømme, T.M. Budnyak, Carbon Nanodots with Solvatochromic Photoluminescence for the Electrochemical Determination of Estrogenic Steroids, *ACS Appl Nano Mater* 2022 (2022) 10962–10972. [https://doi.org/10.1021/ACSANM.2C02219/SUPPL\\_FILE/AN2C02219\\_SI\\_001.PDF](https://doi.org/10.1021/ACSANM.2C02219/SUPPL_FILE/AN2C02219_SI_001.PDF).
- [10] Z. Xie, Q. Du, Y. Wu, X. Hao, C. Liu, Full-band UV shielding and highly daylight luminescent silane-functionalized graphene quantum dot nanofluids and their arbitrary polymerized hybrid gel glasses, *J Mater Chem C Mater* 4 (2016) 9879–9886. <https://doi.org/10.1039/C6TC02035F>.
- [11] Z. Xie, Z. Yin, Y. Wu, C. Liu, X. Hao, Q. Du, X. Xu, White Light-Emitting Diodes Based on Individual Polymerized Carbon Nanodots, *Scientific Reports* 2017 7:1 7 (2017) 1–9. <https://doi.org/10.1038/s41598-017-12083-2>.
- [12] Z. Xie, F. Wang, C.-Y. Liu, Z. Xie, F. Wang, C.-Y. Liu, Organic–Inorganic Hybrid Functional Carbon Dot Gel Glasses, *Advanced Materials* 24 (2012) 1716–1721. <https://doi.org/10.1002/ADMA.201104962>.

- [13] F. Yuan, Y.K. Wang, G. Sharma, Y. Dong, X. Zheng, P. Li, A. Johnston, G. Bappi, J.Z. Fan, H. Kung, B. Chen, M.I. Saidaminov, K. Singh, O. Voznyy, O.M. Bakr, Z.H. Lu, E.H. Sargent, Bright high-colour-purity deep-blue carbon dot light-emitting diodes via efficient edge amination, *Nature Photonics* 2019 14:3 14 (2019) 171–176. <https://doi.org/10.1038/s41566-019-0557-5>.
- [14] J. Xu, Y. Miao, J. Zheng, Y. Yang, X. Liu, J. Xu, Y. Miao, J. Zheng, Y. Yang, X. Liu, Ultrahigh Brightness Carbon Dot–Based Blue Electroluminescent LEDs by Host–Guest Energy Transfer Emission Mechanism, *Adv Opt Mater* 6 (2018) 1800181. <https://doi.org/10.1002/ADOM.201800181>.
- [15] F. Yuan, T. Yuan, L. Sui, Z. Wang, Z. Xi, Y. Li, X. Li, L. Fan, Z. Tan, A. Chen, M. Jin, S. Yang, Engineering triangular carbon quantum dots with unprecedented narrow bandwidth emission for multicolored LEDs, *Nat Commun* 9 (2018) 1–11. <https://doi.org/10.1038/s41467-018-04635-5>.
- [16] Y. Shi, Z. Wang, T. Meng, T. Yuan, R. Ni, Y. Li, X. Li, Y. Zhang, ao Tan, S. Lei, L. Fan, Red Phosphorescent Carbon Quantum Dot Organic Framework-Based Electroluminescent Light-Emitting Diodes Exceeding 5% External Quantum Efficiency, *J. Am. Chem. Soc* 143 (2021) 18941–18951. <https://doi.org/10.1021/jacs.1c07054>.
- [17] H. Jia, Z. Wang, T. Yuan, F. Yuan, X. Li, Y. Li, Z. Tan, L. Fan, S. Yang, Electroluminescent Warm White Light-Emitting Diodes Based on Passivation Enabled Bright Red Bandgap Emission Carbon Quantum Dots, *Advanced Science* 6 (2019) 1900397. <https://doi.org/10.1002/ADVS.201900397>.
- [18] J. Xu, Y. Miao, J. Zheng, H. Wang, Y. Yang, X. Liu, Carbon dot-based white and yellow electroluminescent light emitting diodes with a record-breaking brightness, *Nanoscale* 10 (2018) 11211–11221. <https://doi.org/10.1039/C8NR01834K>.
- [19] N. Urushihara, T. Hirai, A. Dager, Y. Nakamura, Y. Nishi, K. Inoue, R. Suzuki, M. Tanimura, K. Shinozaki, M. Tachibana, Blue-Green Electroluminescent Carbon Dots Derived from Fenugreek Seeds for Display and Lighting Applications, *ACS Appl Nano Mater* 4 (2021) 12472–12480. <https://doi.org/10.1021/acsanm.1c02977>.
